# Supplementary material
Source: PubMed Central journal article supplement (PMC2950619)
Supplement: NIHMS222865-supplement-Sup_figures.pdf [file NIHMS222865-supplement-Sup_figures.pdf]

## **Supplemental Data**

### **Spatiotemporal Regulation of T Cell Costimulation by TCR-CD28 Microclusters and Protein Kinase C $\theta$ Translocation**

**Tadashi Yokosuka, Wakana Kobayashi, Kumiko Sakata-Sogawa, Masako Takamatsu,  
Akiko Hashimoto-Tane, Michael L. Dustin, Makio Tokunaga, and Takashi Saito**

## **Supplemental Text**

Both molecules might be recruited through lipid raft. It has been reported that CD28 engagement re-distributes lipid raft, and that CD28 and PKC $\theta$  associate with downstream molecules in lipid raft (Bi et al., 2001; Viola et al., 1999). However, we failed to observe cluster formation of a raft marker in our systems (data not shown). Alternatively, although PKC $\theta$  may be recruited through a DAG gradient generated at the T cell—APC interface (Spitaler et al., 2006), we have not observed any DAG marker gradient (unpublished observation).

## **Supplemental References**

Bi, K., Tanaka, Y., Coudronniere, N., Sugie, K., Hong, S., van Stipdonk, M. J., and Altman, A. (2001). Antigen-induced translocation of PKC- $\theta$  to membrane rafts is required for T cell activation. *Nat Immunol* 2, 556-563.

Spitaler, M., Emslie, E., Wood, C. D., and Cantrell, D. (2006). Diacylglycerol and protein kinase D localization during T lymphocyte activation. *Immunity* 24, 535-546.

Viola, A., Schroeder, S., Sakakibara, Y., and Lanzavecchia, A. (1999). T lymphocyte costimulation mediated by reorganization of membrane microdomains. *Science* 283, 680-682.

## Supplemental Experimental Procedures

### Plasmid construction

Mouse EGFP- or ECFP-CD28, EGFP-CD3 $\zeta$ , EGFP-CD11a, EGFP- or EYFP-PKC $\theta$ , EGFP-PI3K p55 $\alpha$ , or EYFP-PI3K p85 $\alpha$  was generated by PCR with cDNA from C57/BL6 splenic T cells and subcloned into retroviral vector pMXs (provided by Dr. T. Kitamura, Tokyo University, Japan). A fluorescence tag was added to the C-terminus of each protein except p55 $\alpha$  and p85 $\alpha$ . Mouse CD28 cDNA was originally provided by Dr. J. P. Allison (University of California, Berkeley, CA). Mutant CD28 was generated by PCR or with the QuickChange II Site-Directed Mutagenesis Kit (Stratagene). All fusion proteins contained an *XhoI* site and a poly-glycine linker (LESGGGGSGGGG, LESGGGG, or SGGGGSGGGGLE).

### Preparation of Ig fusion proteins

DNA fragment corresponding to the extracellular domain lacking the signal sequence of mouse WT or YA CTLA-4 was inserted into pME18S expression vector containing a mouse CD150 leader segment at 5' terminus and a human IgG1 Fc segment at 3' terminus. Ig fusion constructs were transfected into HEK293T cells and fusion proteins were purified from the culture supernatant by protein A-affinity chromatography.

### Photobleaching analysis

Photobleaching was performed with a Leica DMIRES2 system. AND-Tg T cells expressing EGFP-CD28 or EGFP-PKC $\theta$  were imaged for 10 min, photobleached for a specific region of interest (ROI) with a 488-nm laser line, and then imaged every 2.5 s. [Recovery ratio] = ([Average intensity of fluorescence in ROI at indicated time] / [Average intensity of fluorescence in control region at indicated time] – [Average intensity of fluorescence in ROI right after photobleaching] / [Average intensity of fluorescence in control region right after photobleaching]) / ([Average intensity of fluorescence in ROI before photobleaching] / [Average intensity of fluorescence in control region before photobleaching] – [Average intensity of fluorescence in ROI right after photobleaching] / [Average intensity of fluorescence in control region right after photobleaching]).

fluorescence in control region right after photobleaching]).

### **Image processing and data analysis**

The area and fluorescence intensity of each region in all images were depicted and measured by ImageJ (National Institutes of Health). Fold intensities in histograms were calculated as described below. [Fold intensity] = ([Intensity of fluorescence of each spot on a diagram] – [Background intensity]) / ([Average intensity of fluorescence on the diagram] – [Background intensity]). CD28<sup>hi</sup> and CD3<sup>hi</sup> regions in cSMAC and CD28<sup>dim</sup> and CD3<sup>dim</sup> regions in pSMAC were depicted and measured in area and in fluorescence intensity by ImageJ (National Institutes of Health). Fluorescence intensities of the specific regions were calculated as described below. [Intensity] = ([Average intensity of each fluorescence in CD28<sup>hi</sup> or CD3<sup>hi</sup> region in cSMAC or in CD28<sup>dim</sup> or CD3<sup>dim</sup> region in pSMAC] – [Background intensity]) / ([Maximum intensity of each fluorescence at the entire cell—bilayer interface] – [Background intensity]) (%). Areas and fluorescence intensities of EGFP-p55 $\alpha$  clusters were measured by ImageJ. Fluorescence intensities of EGFP-p85 $\alpha$  clusters were calculated as described below. [Intensity] = {([Average intensity of EGFP fluorescence at the cluster] – [Background intensity]) x [Area of the cluster]} / {([Average intensity of EGFP fluorescence at the entire cell—bilayer interface] – [Background intensity]) x [Area of the entire cell—bilayer interface]} (%). Significant differences were evaluated by the Student's t test with StatView software. Approximated curves in FRAP studies were depicted by Keleida Graph (Synergy Software, PA, USA).

### **Co-stimulation analysis**

5-10 x 10<sup>4</sup> T cells were incubated with 5 ng/ml PMA with or without 2  $\mu$ g/ml anti-mouse CD28 (PV-1) in a 96-well round-bottomed dish. Cells were pulsed with 2 Ci/well of <sup>3</sup>H-thymidine for 12 h after 48 h culture and measured with the Microbeta scintillation counter.

### **Western blotting**

AND-TCR T cell hybridomas expressing ECFP-CD28 and/or EYFP-PKC $\theta$  or

Ag-stimulated CD4<sup>+</sup> T cells from AND-Tg *Rag2*<sup>-/-</sup> mice were lysed with 50 mM Tris-HCl, 50 mM NaCl, and 5 mM EDTA lysis buffer containing 1% digitonin, 1% Nonidet P-40 or 1% Triton X-100, immunoprecipitated with hamster monoclonal anti-CD28 (37.51, eBioscience) or control hamster monoclonal, and blotted with rabbit polyclonal anti-PKC $\theta$  (Santa Cruz), goat polyclonal anti-CD28 (Santa Cruz), or HRP-labeled monoclonal anti-GFP (Miltenyi Biotec).

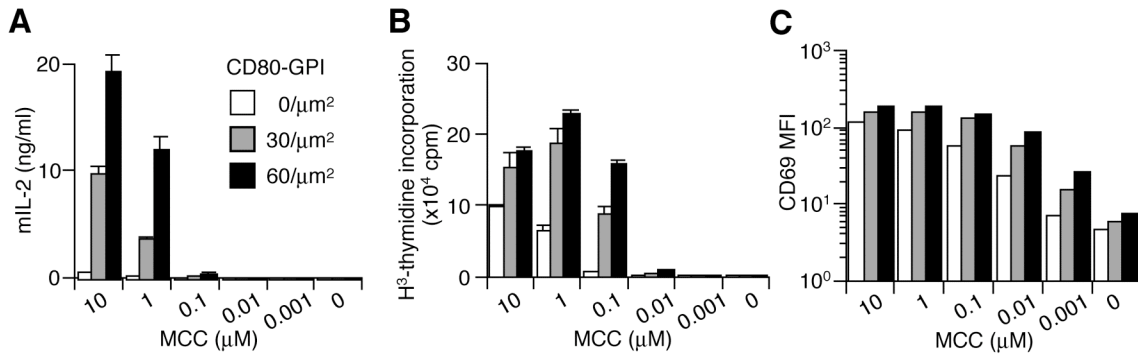

**Figure S1. Costimulatory function of CD80-GPI for effector T cell activation**

CD4 T cells from AND-Tg mice were stimulated with MCC88-103-pulsed APCs and sequentially cultured with recombinant human IL-2. After one week or later, the effector cells were restimulated with silica beads coated with lipid bilayer containing I-E<sup>k</sup>, ICAM-1, and CD80 at various densities. The silica beads were prepulsed with MCC88-103 at the indicated doses.

(A) Concentration of IL-2 in the supernatant was measured by ELISA 48 h after stimulation. The graph shows mean +/- SD (n=3). A representative of three independent experiments is shown.

(B) Cell proliferation was assessed by measuring <sup>3</sup>H-thymidine uptake 60 h after stimulation. The graph shows mean +/- SD (n=3). A representative of three independent experiments is shown.

(C) CD69 expression was analyzed by FACS 6 h after stimulation. A representative of three independent experiments is shown.

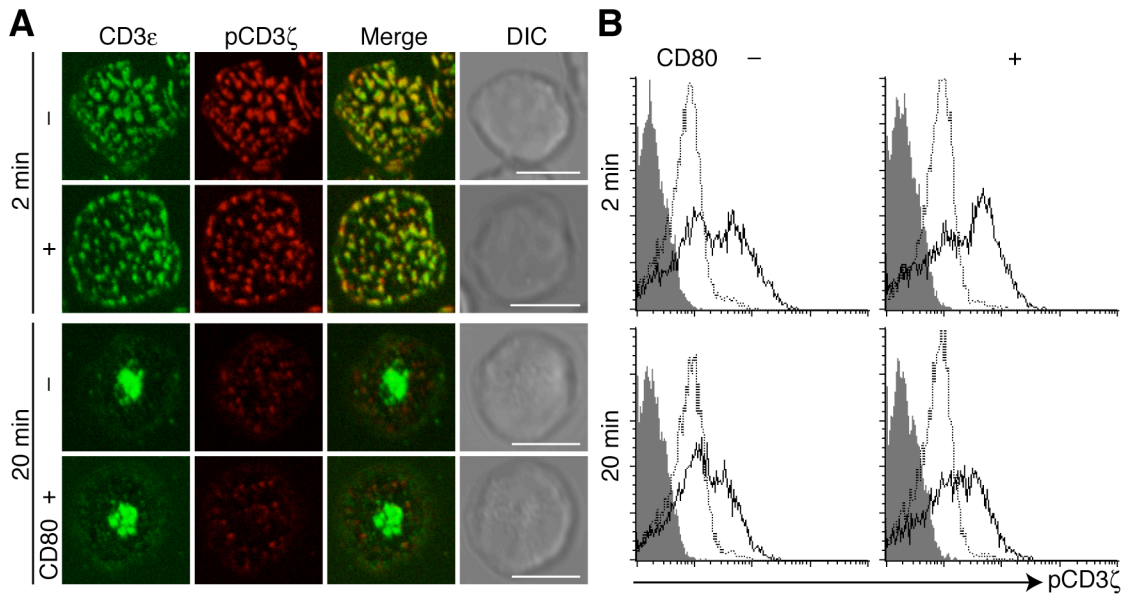

**Figure S2. No significant effect on the phosphorylation status of TCR proximal signals by CD28—CD80 binding**

(A) Freshly isolated T cells from AND-Tg mice were plated on a planar bilayer containing I-E<sup>k</sup> and ICAM-1 (row 1 and 3) plus CD80 (row 2 and 4) (pre-pulsed with MCC88-103), fixed 2 min (top two rows) or 20 min (bottom two rows) after contact, and stained for CD3ε and phospho-CD3ζ. The locations of CD3ε (green) and phospho-CD3ζ (red) were imaged by confocal microscopy. Scale bars represent 5 μm. A representative of three independent experiments is shown.

(B) T cells in (A) were conjugated with MCC88-103-prepulsed or unpulsed silica beads coated with a lipid bilayer containing I-E<sup>k</sup> and ICAM-1 (left) plus CD80 (right). The cells were fixed 2 min (top) or 20 min (bottom) after conjugation, stained for phospho-CD3ζ, and analyzed by FACS. Solid line, Ag-stimulated cells stained by anti-phospho-CD3ζ; dotted line, unstimulated cells stained by anti-phospho-CD3ζ; shadow, Ag-stimulated cells stained by control. A representative of three independent experiments is shown.

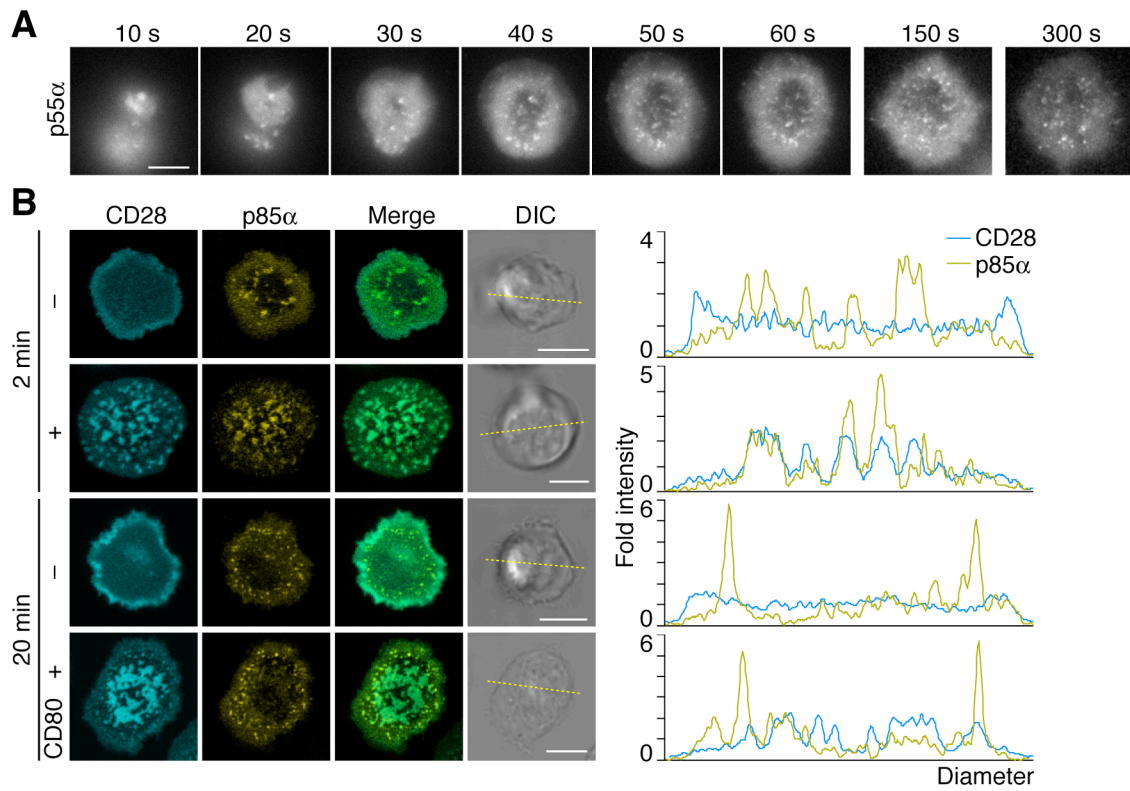

**Figure S3. Transient localization of PI3K p55 $\alpha$ /p85 $\alpha$  at CD28 MCs**

(A) AND-Tg T cells expressing EGFP-p55 $\alpha$  were plated on a planar bilayer containing I-E<sup>k</sup> and ICAM-1 (prepulsed with MCC88-103). Images were obtained at video rate (30 frames/s) using TIRFM (time shown above images). A scale bar presents 5  $\mu$ m. A representative of five independent experiments is shown.

(B) AND-TCR T cell hybridomas expressing both ECFP-CD28 and EYFP-p85 $\alpha$  were plated on an MCC88-103-prepulsed planar bilayer containing I-E<sup>k</sup> and ICAM-1 without (rows 1 and 3) or with CD80 (rows 2 and 4), and real-time imaged 2 and 20 min after contact by confocal microscopy. Histograms on right panels show fold fluorescence intensities of ECFP-CD28 (blue) and p85 $\alpha$  (yellow) on the diagonal yellow lines in DIC images. Scale bars represent 5  $\mu$ m. A representative of two independent experiments is shown.

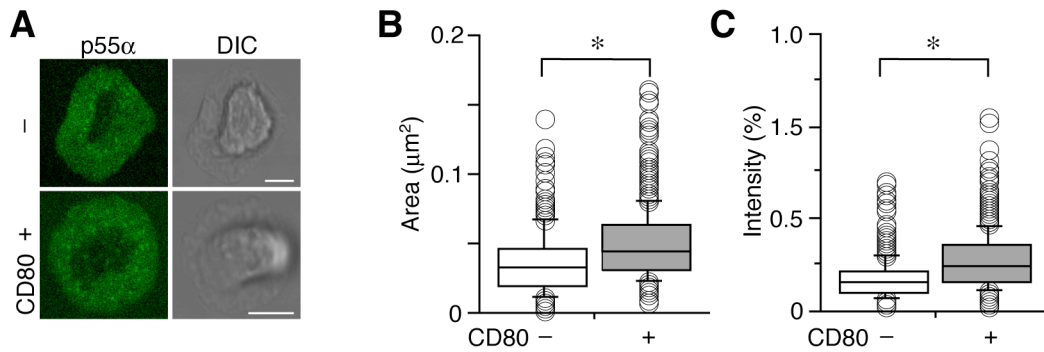

**Figure S4. Augmentation of PI3K p55 $\alpha$  clusters in size and density by CD28—CD80 binding**

(A) AND-Tg T cells expressing EGFP-p55 $\alpha$  were plated on a planar bilayer containing I-E<sup>k</sup> and ICAM-1 without (top) or with CD80 (bottom) (pre-pulsed with MCC88-103). The cells were real-time imaged from time zero to 5 min by confocal microscopy. The images show T cells 2 min after contact. Scale bars represent 5  $\mu$ m. A representative of three independent experiments is shown.

(B and C) EGFP-p55 $\alpha$  clusters in 15 cells without CD80-GPI (n=377) and those in 16 cells with CD80-GPI (n=503) were measured in area (B) and in fluorescence intensity compared to the total intensity of the entire cell—bilayer interface (C). The graphs show mean +/- SD obtained by two independent experiments. \*, p value < 0.001 with Student's t test.



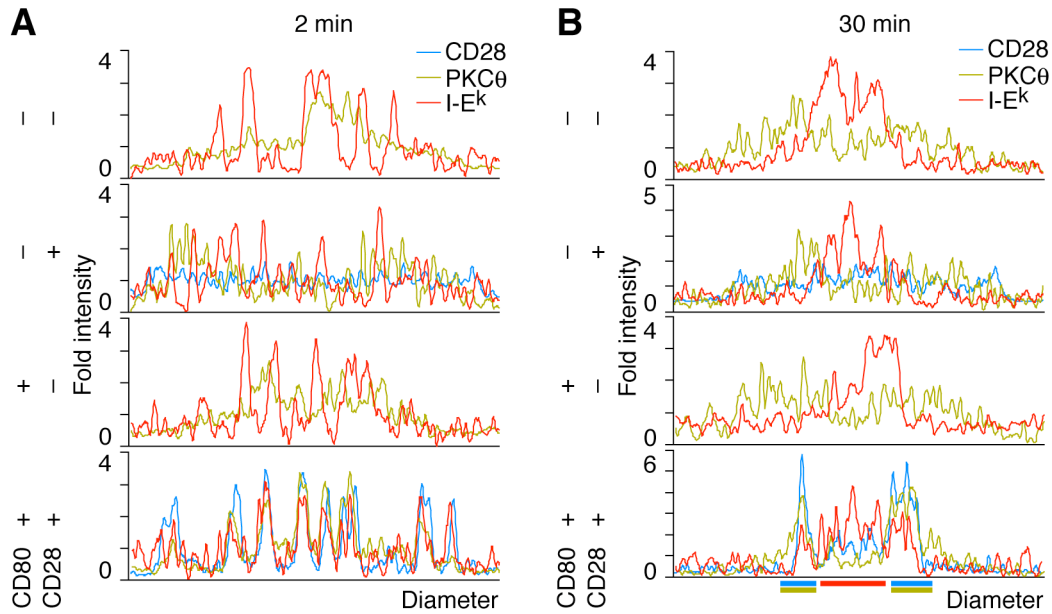

**Figure S5. Initial colocalization of PKCθ with CD28 at TCR MCs and annular form of PKCθ clusters with CD28 after cSMAC formation**

AND-Tg T cells from *Cd28*<sup>-/-</sup> mice were transfected with EYFP-PKCθ (**Fig. 5C** and **5E**, rows 1 and 3) plus ECFP-CD28 (**Figure 5C** and **5E**, rows 2 and 4) and were plated on a planar bilayer containing Cy5-labeled I-E<sup>k</sup> and ICAM-1 (**Figure 5C** and **5E**, top two rows) plus CD80 (**Figure 5C** and **5E**, bottom two rows). Cells were imaged by confocal microscopy 2 min (**Figure 5C**) or 30 min after contact (**Figure 5E**). Fold fluorescence intensities of ECFP-CD28 (blue), EYFP-PKCθ (yellow), and Cy5-I-E<sup>k</sup> (red) on the diagonal yellow lines in **Figure 5C** and **5E** DIC images were depicted in histograms in (**A**) and (**B**), respectively.

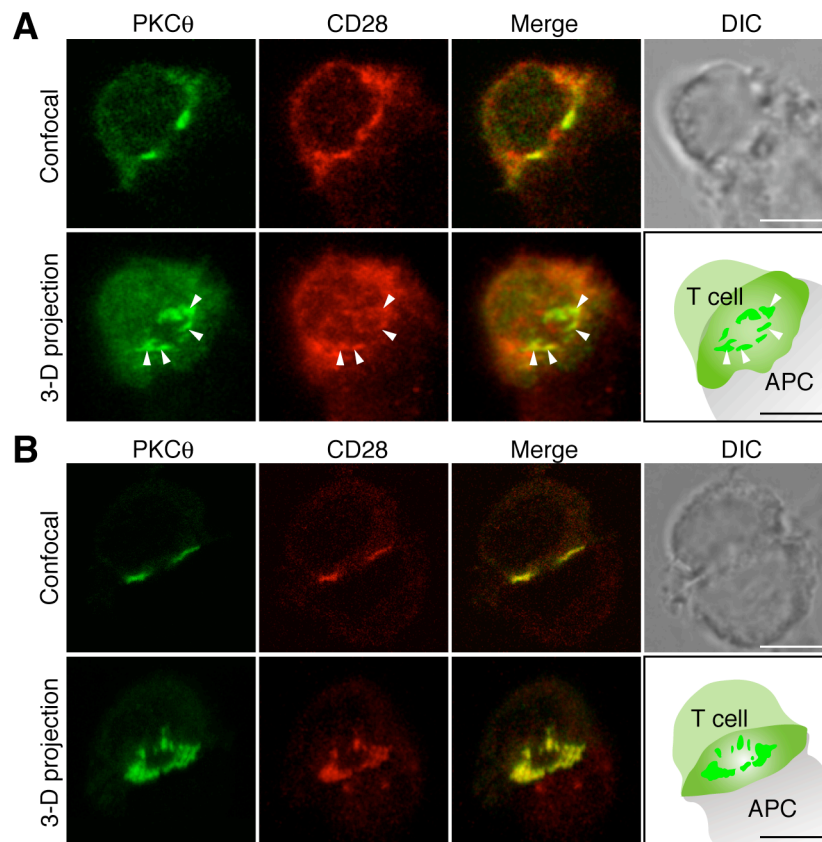

**Figure S6. An annular form of PKCθ clusters at the T cell—APC interface**

5C.C7-Tg T cells expressing EGFP-PKCθ were conjugated with MCC88-103-pulsed DC-1 expressing CD80, fixed 30 min after conjugation, stained with anti-mouse CD28 (PV-1) and Alexa Fluor 568 anti-hamster IgG, and imaged by confocal microscopy (top row). Images were obtained every 0.25 μm along the z-axis and reconstructed to 3-D projection (bottom row). Both (A) and (B) are representative images in three independent experiments. Arrowheads represent PKCθ and CD28 clusters. Scale bars represent 5 μm. The 3-D reconstructed images are available in **Movie S9**.

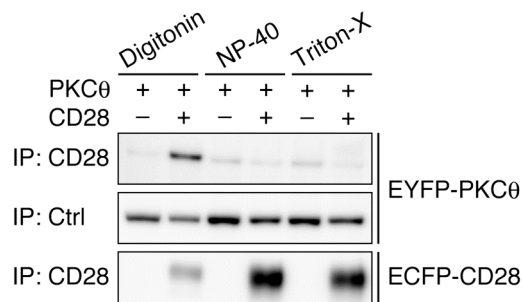

**Figure S7. Weak assembly of CD28 with PKCθ detected upon PMA stimulation**

AND-TCR T cell hybridomas expressing EYFP-PKCθ and/or ECFP-CD28 in **Figure 4A** and **4B** were stimulated for 2 min with 50 nM PMA. Cells were lysed with 1% digitonin, 1% NP-40, or 1% Triton-X lysis buffer as depicted in the figure, precipitated with anti-CD28 (top and bottom) or control (middle), and blotted for PKCθ (top and middle) or CD28 (bottom). A representative of three independent experiments is shown.

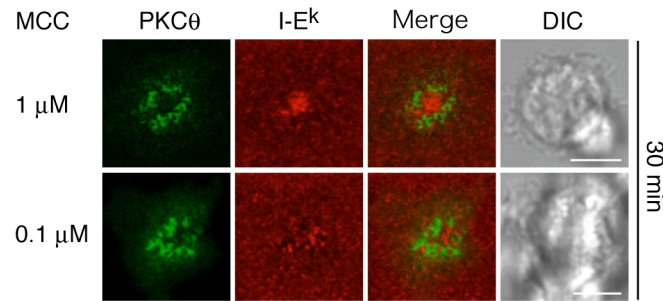

**Figure S8. Generation of the annular form of PKCθ clusters without cSMAC formation**

5C.C7 Tg T cells expressing EGFP-PKCθ (green) were plated on a planar bilayer containing Cy5-I-E<sup>k</sup> (red) and ICAM-1 prepulsed with 1 μM (top) or 0.1 μM MCC88-103 (bottom) and imaged by confocal microscopy 30 min after contact. Scale bars represent 5 μm. A representative of two independent experiments is shown.

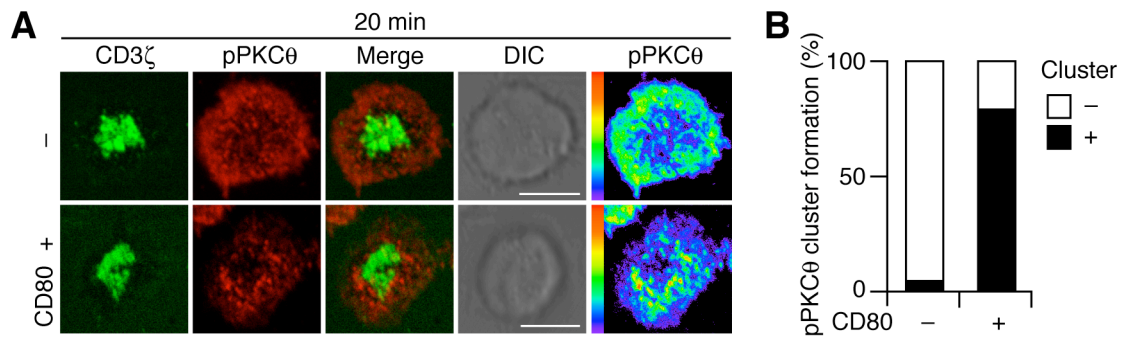

**Figure S9. Accumulation of phospho-PKC $\theta$  at the outer region of cSMAC**

(A) AND-Tg T cells expressing EYFP-CD3 $\zeta$  (green) were plated on a planar bilayer containing I-E<sup>k</sup> and ICAM-1 (top) plus CD80 (bottom) (prepulsed with MCC88-103). Cells were fixed 20 min after contact, stained for phospho-PKC $\theta$  (red), and imaged by confocal microscopy. Scale bars represent 5  $\mu$ m. A representative of two independent experiments is shown.

(B) Formation of phospho-PKC $\theta$  clusters in (A) was evaluated by pattern recognition in the presence or absence of CD80-GPI. n=131 and 88 for CD80<sup>-</sup> and CD80<sup>+</sup>, respectively. A representative of two independent experiments is shown.

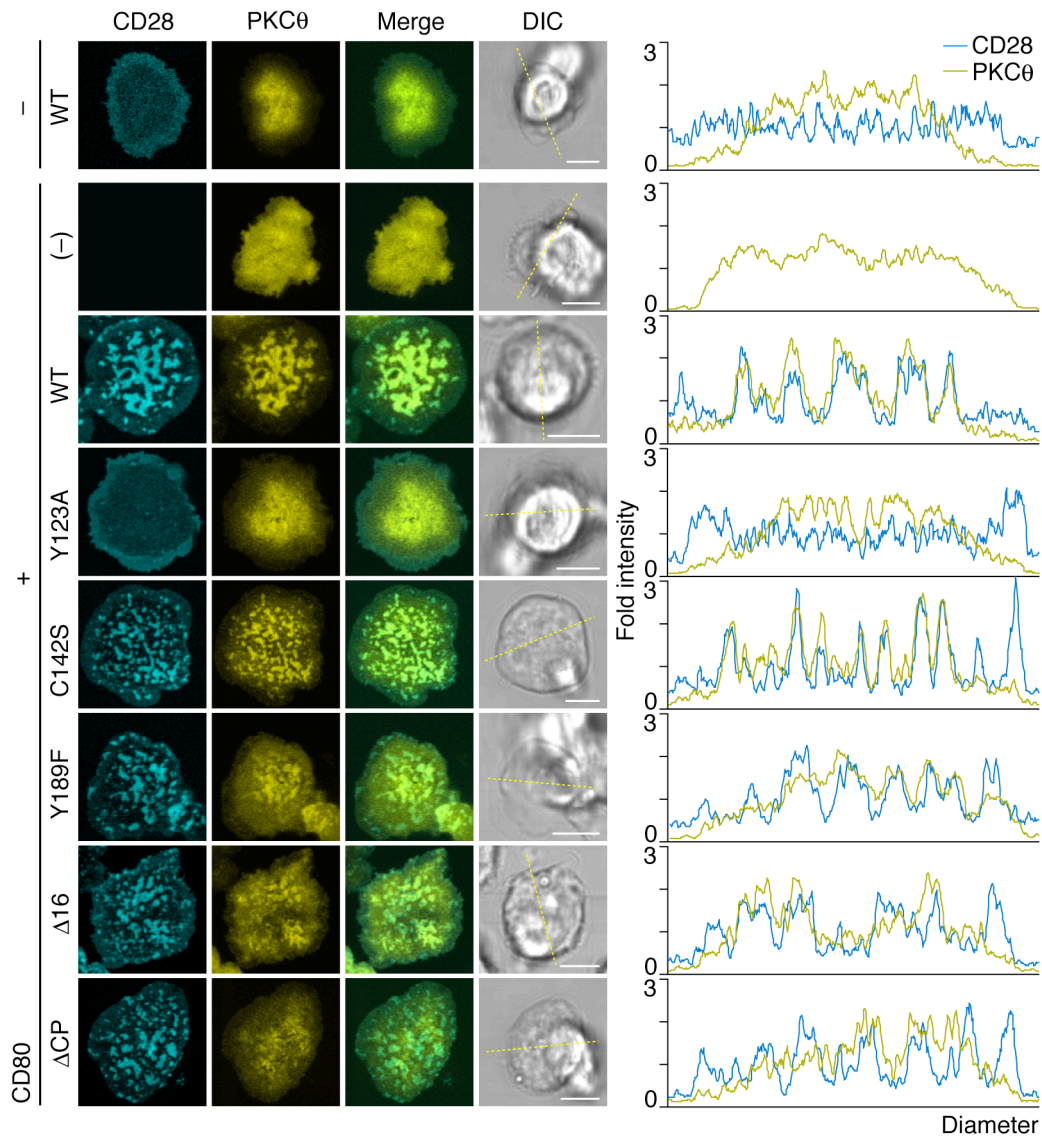

**Figure S10. Function of CD28 cytoplasmic tail in the translocation of PKCθ to TCR-CD28 MCs**

AND-TCR T cell hybridomas expressing EYFP-PKCθ (yellow) and ECFP-WT or mutant CD28 (cyan) were plated on a planar bilayer containing I-E<sup>k</sup> and ICAM-1 (top) plus CD80 (pre-pulsed with MCC88-103) (bottom seven rows), and real-time imaged by confocal microscopy 2 min after cell—bilayer contact. Histograms show the fold fluorescence intensities of ECFP-CD28 (blue) and EYFP-PKCθ (yellow) on the diagonal yellow lines in

DIC images. Scale bars represent 5  $\mu\text{m}$ . A representative of three independent experiments is shown.
